# Supplementary material for: The Pervasive Presence of Fluctuating Oxygenation in Tumors
Source: Oxford University Press journal article supplement (doi:10.1158/0008-5472.can-07-6387), 2008-07-15
Supplement: 00085472can076387-sup-stable_2.pdf [file 00085472can076387-sup-stable_2.pdf]

Table 2: Significance table for global Moran's I spatial autocorrelation of difference images

|       | 9L  |   |   |   |    |    |    |     | FSA |                |   |    |    |    |     |   | R3230 |   |    |    |    |     |  |  |
|-------|-----|---|---|---|----|----|----|-----|-----|----------------|---|----|----|----|-----|---|-------|---|----|----|----|-----|--|--|
|       |     | 1 | 4 | 8 | 12 | 20 | 40 | 100 | 1   | 4              | 8 | 12 | 20 | 40 | 100 | 1 | 4     | 8 | 12 | 20 | 40 | 100 |  |  |
| 9L    | 1   | - |   |   |    | Y  | Y  | Y   |     | Y <sup>1</sup> | Y | Y  | Y  | Y  | Y   |   |       | Y | Y  | Y  | Y  | Y   |  |  |
|       | 4   |   | - |   |    | Y  | Y  | Y   |     | Y              | Y | Y  | Y  | Y  | Y   |   |       |   | Y  | Y  | Y  | Y   |  |  |
|       | 8   |   |   | - |    |    | Y  | Y   |     | Y              | Y | Y  | Y  | Y  | Y   |   |       |   |    | Y  | Y  | Y   |  |  |
|       | 12  |   |   |   | -  |    | Y  | Y   |     | Y              | Y | Y  | Y  | Y  | Y   |   |       |   |    | Y  | Y  | Y   |  |  |
|       | 20  | Y | Y |   |    | -  | Y  | Y   |     |                | Y | Y  | Y  | Y  | Y   | Y |       |   |    |    | Y  | Y   |  |  |
|       | 40  | Y | Y | Y | Y  | Y  | -  | Y   | Y   |                |   |    |    | Y  | Y   | Y | Y     | Y | Y  | Y  |    | Y   |  |  |
|       | 100 | Y | Y | Y | Y  | Y  | Y  | -   | Y   | Y              | Y | Y  |    |    | Y   | Y | Y     | Y | Y  | Y  | Y  |     |  |  |
| FSA   | 1   |   |   |   |    |    | Y  | Y   | -   | Y <sup>2</sup> | Y | Y  | Y  | Y  | Y   |   |       |   |    | Y  | Y  | Y   |  |  |
|       | 4   | Y | Y | Y | Y  |    |    | Y   | Y   | -              |   |    | Y  | Y  | Y   | Y | Y     |   |    |    | Y  | Y   |  |  |
|       | 8   | Y | Y | Y | Y  | Y  |    | Y   | Y   |                | - |    |    | Y  | Y   | Y | Y     | Y | Y  |    |    | Y   |  |  |
|       | 12  | Y | Y | Y | Y  | Y  |    | Y   | Y   |                |   | -  |    | Y  | Y   | Y | Y     | Y | Y  | Y  |    | Y   |  |  |
|       | 20  | Y | Y | Y | Y  | Y  |    |     | Y   | Y              |   |    | -  | Y  | Y   | Y | Y     | Y | Y  | Y  |    | Y   |  |  |
|       | 40  | Y | Y | Y | Y  | Y  | Y  |     | Y   | Y              | Y | Y  | Y  | -  | Y   | Y | Y     | Y | Y  | Y  | Y  |     |  |  |
|       | 100 | Y | Y | Y | Y  | Y  | Y  | Y   | Y   | Y              | Y | Y  | Y  | Y  | -   | Y | Y     | Y | Y  | Y  | Y  | Y   |  |  |
| R3230 | 1   |   |   |   |    | Y  | Y  | Y   |     | Y              | Y | Y  | Y  | Y  | Y   | - |       | Y | Y  | Y  | Y  | Y   |  |  |
|       | 4   |   |   |   |    |    | Y  | Y   |     | Y              | Y | Y  | Y  | Y  | Y   |   | -     |   |    | Y  | Y  | Y   |  |  |
|       | 8   | Y |   |   |    |    | Y  | Y   |     |                | Y | Y  | Y  | Y  | Y   | Y |       | - |    |    | Y  | Y   |  |  |
|       | 12  | Y | Y |   |    |    | Y  | Y   |     |                | Y | Y  | Y  | Y  | Y   | Y |       |   | -  |    | Y  | Y   |  |  |
|       | 20  | Y | Y | Y | Y  |    |    | Y   | Y   |                |   | Y  | Y  | Y  | Y   | Y | Y     |   |    | -  | Y  | Y   |  |  |
|       | 40  | Y | Y | Y | Y  | Y  |    | Y   | Y   | Y              |   |    |    | Y  | Y   | Y | Y     | Y | Y  | Y  | -  | Y   |  |  |
|       | 100 | Y | Y | Y | Y  | Y  | Y  |     | Y   | Y              | Y | Y  | Y  |    | Y   | Y | Y     | Y | Y  | Y  | Y  | -   |  |  |

<sup>1</sup> “Y” at this location indicates that for a region with a pixel radius of 4, FSA has significantly ( $p < 0.05$ ) higher spatial autocorrelation than 9L

<sup>2</sup> “Y” at this location indicates that within the FSA tumor, a region with a pixel radius of 1 has significantly ( $p < 0.05$ ) higher spatial autocorrelation than a region with a pixel radius of 4.
